# Supplementary material for: Trends and Characteristics of Emergency Medical Services in Italy: A 5-Years Population-Based Registry Analysis
Source: MDPI journal article supplement (doi:10.3390/healthcare8040551), 2020-12-11
Supplement: s1 [file s1]

**Table S1.** Proportions (within year percentage) and 95% Confidence Interval (95%CI) of Emergency Medical Services (EMS) calls for which at least one rescue vehicle was dispatched, by year (2013–2017): within year proportions and 95% Confidence Interval.

| Caller               | 2013                | 2014                | 2015                | 2016                | 2017                | overall             | 2013–2017    | <i>p</i> |
|----------------------|---------------------|---------------------|---------------------|---------------------|---------------------|---------------------|--------------|----------|
|                      | % (95% CI)          | % (95% CI)          | % (95% CI)          | % (95% CI)          | % (95% CI)          | % (95% CI)          | Difference % | Value    |
| Private citizen      | 87.36 (87.23–87.49) | 86.99 (86.86–87.12) | 86.76 (86.64–86.88) | 87.19 (87.07–87.30) | 88.70 (88.59–88.81) | 87.41 (87.36–87.47) | 1.53         | <0.001   |
| Nursing home         | 3.40 (3.32–3.47)    | 3.41 (3.34–3.48)    | 3.48 (3.41–3.54)    | 3.04 (2.99–3.10)    | 3.10 (3.04–3.16)    | 3.27 (3.24–3.30)    | –8.82        | NS       |
| Authority            | 2.89 (2.83–2.96)    | 3.10 (3.03–3.17)    | 3.22 (3.16–3.28)    | 3.54 (3.48–3.60)    | 2.62 (2.56–2.67)    | 3.09 (3.06–3.12)    | –9.34        | NS       |
| GP/Paediatrician     | 2.51 (2.45–2.57)    | 2.60 (2.54–2.66)    | 2.44 (2.39–2.50)    | 2.23 (2.18–2.28)    | 1.73 (1.69–1.78)    | 2.28 (2.25–2.30)    | –31.08       | <0.05    |
| EMS Physician        | 2.48 (2.42–2.54)    | 2.68 (2.62–2.74)    | 2.35 (2.30–2.40)    | 1.95 (1.90–1.99)    | 1.45 (1.41–1.49)    | 2.14 (2.12–2.17)    | –41.53       | <0.001   |
| Private hospital     | 0.21 (0.20–0.23)    | 0.19 (0.18–0.21)    | 0.18 (0.16–0.19)    | 0.14 (0.13–0.15)    | 0.16 (0.15–0.17)    | 0.17 (0.17–0.18)    | –23.81       | NS       |
| Other †              | 1.14 (1.10–1.19)    | 1.02 (0.98–1.06)    | 1.57 (1.53–1.61)    | 1.91 (1.87–1.96)    | 2.24 (2.19–2.30)    | 1.63 (1.61–1.65)    | 96.49        | <0.001   |
| <b>Call Time</b>     |                     |                     |                     |                     |                     |                     |              |          |
| 7a.m.–6:59p.m.       | 64.64 (64.45–64.84) | 64.92 (64.73–65.10) | 65.43 (65.26–65.59) | 65.17 (65.01–65.33) | 65.34 (65.18–65.51) | 65.13 (65.06–65.21) | 1.08         | <0.001   |
| 7p.m.–6:59a.m.       | 35.36 (35.16–35.55) | 35.08 (34.90–35.27) | 34.57 (34.41–34.74) | 34.83 (34.67–34.99) | 34.66 (34.49–34.82) | 34.87 (34.79–34.94) | 1.98         | <0.05    |
| <b>Call Location</b> |                     |                     |                     |                     |                     |                     |              |          |
| Home                 | 64.79 (64.60–64.98) | 64.91 (64.73–65.10) | 63.68 (63.52–63.85) | 63.07 (62.91–63.23) | 62.85 (62.68–63.02) | 63.76 (63.68–63.83) | –2.99        | <0.001   |
| Street or highway    | 12.66 (12.53–12.80) | 12.74 (12.61–12.87) | 12.84 (12.73–12.96) | 13.33 (13.22–13.45) | 13.08 (12.96–13.19) | 12.96 (12.90–13.01) | 3.32         | NS       |
| Public building      | 3.50 (3.42–3.57)    | 3.48 (3.41–3.55)    | 3.65 (3.59–3.71)    | 3.71 (3.64–3.77)    | 3.64 (3.57–3.70)    | 3.60 (3.57–3.63)    | 4.00         | NS       |
| Industrial place     | 1.88 (1.83–1.94)    | 1.92 (1.87–1.98)    | 2.05 (2.00–2.10)    | 1.96 (1.91–2.00)    | 1.92 (1.87–1.97)    | 1.95 (1.93–1.97)    | 2.13         | NS       |
| Sport building       | 0.99 (0.95–1.03)    | 0.98 (0.95–1.02)    | 0.95 (0.92–0.98)    | 0.89 (0.86–0.92)    | 0.91 (0.88–0.95)    | 0.94 (0.93–0.96)    | –8.08        | NS       |
| School               | 0.88 (0.84–0.91)    | 0.98 (0.94–1.02)    | 0.86 (0.83–0.89)    | 0.89 (0.85–0.92)    | 0.93 (0.90–0.96)    | 0.90 (0.89–0.92)    | 5.68         | NS       |
| Other locations *    | 15.31 (15.16–15.45) | 14.99 (14.85–15.12) | 15.97 (15.84–16.09) | 16.16 (16.03–16.28) | 16.68 (16.55–16.80) | 15.89 (15.83–15.94) | 8.95         | <0.001   |
| Total numbers        | 240,878             | 262,210             | 326,991             | 341,621             | 323,155             | 1,494,855           | 34.16        |          |

† Other Callers comprise all calls originally labelled as “none of the above”; \* Other Call locations comprise nursing homes, private hospitals, and residential care facilities; GP: general practitioner

Table S2. Characteristics of Emergency Medical Services (EMS) rescue vehicle dispatches by year (2013–2017) among 1 658 728 total rescue vehicles dispatched.

| EMS dispatches                                    | 2013                | 2014                | 2015                | 2016                | 2017                | overall             | 2013–2017      | <i>p</i> |
|---------------------------------------------------|---------------------|---------------------|---------------------|---------------------|---------------------|---------------------|----------------|----------|
|                                                   | % (95% CI)          | % (95% CI)          | % (95% CI)          | % (95% CI)          | % (95% CI)          | % (95% CI)          | Difference (%) | Value    |
| Number of People Involved                         |                     |                     |                     |                     |                     |                     |                |          |
| 1                                                 | 85.48 (85.35–85.62) | 83.82 (83.68–83.95) | 81.45 (81.33–81.58) | 80.27 (80.14–80.40) | 79.82 (79.69–79.95) | 81.92 (81.86–81.98) | –6.62          | <0.001   |
| 2                                                 | 14.05 (13.92–14.18) | 15.62 (15.48–15.75) | 16.84 (16.72–16.96) | 17.65 (17.53–17.77) | 18.09 (17.96–18.22) | 16.66 (16.60–16.71) | 28.75          | <0.001   |
| >2                                                | 0.47 (0.44–0.49)    | 0.57 (0.54–0.60)    | 1.44 (1.40–1.48)    | 2.08 (2.04–2.13)    | 2.09 (2.04–2.14)    | 1.42 (1.41–1.44)    | 344.68         | <0.001   |
| Health Problem/Injury Reported by the Caller      |                     |                     |                     |                     |                     |                     |                |          |
| Traumatic                                         | 20.21 (20.06–20.37) | 20.12 (19.97–20.26) | 22.53 (22.39–22.66) | 22.84 (22.71–22.97) | 22.78 (22.64–22.91) | 21.88 (21.82–21.95) | 12.72          | <0.001   |
| Cardiocirculatory                                 | 15.48 (15.34–15.62) | 15.06 (14.93–15.19) | 14.55 (14.44–14.67) | 14.49 (14.38–14.60) | 16.13 (16.01–16.25) | 15.13 (15.07–15.18) | 4.2            | <0.05    |
| Neurological                                      | 12.27 (12.14–12.39) | 12.53 (12.41–12.65) | 11.97 (11.86–12.08) | 11.93 (11.83–12.03) | 11.27 (11.16–11.37) | 11.96 (11.91–12.01) | –8.15          | <0.001   |
| Respiratory                                       | 11.67 (11.54–11.79) | 11.58 (11.46–11.69) | 11.44 (11.34–11.54) | 11.00 (10.90–11.10) | 11.28 (11.17–11.38) | 11.37 (11.32–11.42) | –3.34          | NS       |
| Psychiatric                                       | 3.20 (3.13–3.27)    | 3.30 (3.23–3.36)    | 3.07 (3.01–3.13)    | 3.16 (3.10–3.21)    | 3.09 (3.04–3.15)    | 3.16 (3.13–3.18)    | –3.44          | NS       |
| Unknown                                           | 2.46 (2.41–2.52)    | 2.26 (2.20–2.31)    | 1.92 (1.88–1.97)    | 2.14 (2.10–2.19)    | 2.38 (2.33–2.43)    | 2.22 (2.20–2.24)    | –3.25          | NS       |
| Toxicological                                     | 1.74 (1.69–1.79)    | 1.63 (1.59–1.68)    | 1.48 (1.44–1.52)    | 1.50 (1.46–1.54)    | 1.40 (1.36–1.43)    | 1.53 (1.52–1.55)    | –19.54         | NS       |
| Obstetric/gynaecological                          | 0.89 (0.85–0.92)    | 0.80 (0.77–0.84)    | 0.73 (0.71–0.76)    | 0.77 (0.75–0.80)    | 0.82 (0.79–0.85)    | 0.80 (0.79–0.81)    | –7.87          | NS       |
| Unclear problem                                   | 32.08 (31.90–32.26) | 32.73 (32.55–32.90) | 32.30 (32.15–32.45) | 32.18 (32.03–32.33) | 30.86 (30.71–31.01) | 31.96 (31.88–32.03) | –3.8           | <0.001   |
| Type of Rescue Vehicle Dispatched §               |                     |                     |                     |                     |                     |                     |                |          |
| Basic EMV                                         | 68.20 (68.02–68.37) | 67.66 (67.49–67.83) | 67.50 (67.35–67.65) | 69.71 (69.56–69.85) | 68.42 (68.27–68.57) | 68.39 (68.32–68.46) | 0.32           | NS       |
| Advanced EMV type 1                               | 27.87 (27.70–28.04) | 27.96 (27.80–28.13) | 27.82 (27.67–27.96) | 26.78 (26.64–26.92) | 26.87 (26.73–27.02) | 27.42 (27.35–27.49) | –3.59          | <0.001   |
| Advanced EMV type 2                               | 3.52 (3.45–3.59)    | 3.92 (3.85–3.99)    | 3.72 (3.66–3.78)    | 2.81 (2.75–2.86)    | 4.00 (3.94–4.07)    | 3.58 (3.55–3.60)    | 13.64          | NS       |
| Helicopter                                        | 0.41 (0.39–0.44)    | 0.46 (0.44–0.49)    | 0.68 (0.66–0.71)    | 0.70 (0.67–0.72)    | 0.69 (0.67–0.72)    | 0.61 (0.60–0.62)    | 68.29          | <0.001   |
| Other                                             |                     |                     | 0.01 (0.01–0.02)    | 0.01 (0.01–0.01)    | 0.01 (0.01–0.01)    | 0.01 (0.01–0.01)    | –              |          |
| Number of Rescue Vehicles Dispatched              |                     |                     |                     |                     |                     |                     |                |          |
| 1                                                 | 84.45 (84.31–84.59) | 82.23 (82.09–82.37) | 79.81 (79.68–79.94) | 79.29 (79.16–79.42) | 79.09 (78.96–79.22) | 80.73 (80.67–80.79) | –6.35          | <0.001   |
| 2                                                 | 14.87 (14.74–15.01) | 16.86 (16.72–17.00) | 18.38 (18.25–18.50) | 19.08 (18.96–19.21) | 19.27 (19.14–19.39) | 17.93 (17.87–17.99) | 29.59          | <0.001   |
| ≥3                                                | 0.67 (0.64–0.71)    | 0.91 (0.88–0.94)    | 1.54 (1.50–1.58)    | 1.63 (1.59–1.67)    | 1.64 (1.60–1.69)    | 1.34 (1.32–1.36)    | 144.78         | <0.05    |
| Number of Patients Transported Per Rescue Vehicle |                     |                     |                     |                     |                     |                     |                |          |

|                           |                     |                     |                     |                     |                     |                     |       |        |
|---------------------------|---------------------|---------------------|---------------------|---------------------|---------------------|---------------------|-------|--------|
| None                      | 23.44 (23.28–23.60) | 23.73 (23.57–23.88) | 25.30 (25.16–25.44) | 25.96 (25.82–26.10) | 26.75 (26.61–26.90) | 25.22 (25.15–25.28) | 14.12 | <0.001 |
| One person                | 75.50 (75.33–75.66) | 75.24 (75.09–75.40) | 73.30 (73.16–73.44) | 72.98 (72.84–73.12) | 72.21 (72.06–72.36) | 73.72 (73.66–73.79) | –4.36 | <0.001 |
| More than one person      | 1.02 (0.98–1.06)    | 1.03 (0.99–1.07)    | 1.12 (1.09–1.16)    | 1.06 (1.03–1.09)    | 1.04 (1.00–1.07)    | 1.06 (1.04–1.07)    | 1.96  | NS     |
| <hr/>                     |                     |                     |                     |                     |                     |                     |       |        |
| Site of Rescue Completion |                     |                     |                     |                     |                     |                     |       |        |
| Hospital                  | 76.56 (76.40–76.72) | 76.27 (76.12–76.43) | 74.42 (74.28–74.57) | 73.94 (73.80–74.08) | 73.17 (73.02–73.31) | 74.74 (74.68–74.81) | –4.43 | <0.001 |
| Rendez vous               | 0.08 (0.07–0.09)    | 0.08 (0.07–0.09)    | 0.05 (0.05–0.06)    | 0.10 (0.09–0.11)    | 0.08 (0.07–0.09)    | 0.08 (0.07–0.08)    | 0     | NS     |
| At home                   | 0.04 (0.03–0.05)    | 0.01 (0.00–0.01)    | 0.01 (0.00–0.01)    | 0.01 (0.01–0.01)    | 0.01 (0.01–0.01)    | 0.01 (0.01–0.01)    | –75   | NS     |
| Morgue                    | 0.00 (0.00–0.01)    | 0.00 (0.00–0.01)    | 0.01 (0.00–0.01)    | 0.00 (0.00–0.01)    | 0.00 (0.00–0.01)    | 0.01 (0.00–0.01)    | 0     | NS     |
| Other *                   | 21.21 (21.05–21.36) | 20.75 (20.61–20.90) | 21.66 (21.52–21.79) | 22.30 (22.17–22.43) | 23.08 (22.94–23.21) | 21.90 (21.84–21.96) | 8.82  | <0.001 |
| Rescue cancelled          | 2.12 (2.06–2.17)    | 2.88 (2.82–2.94)    | 3.58 (3.52–3.64)    | 3.65 (3.59–3.70)    | 3.66 (3.60–3.72)    | 3.26 (3.24–3.29)    | 72.64 | <0.001 |
| Total Vehicle Dispatched  | 261,519             | 288,288             | 365,437             | 382,382             | 362,102             | 1,658,728           |       |        |

EMV: emergency medical vehicle; §Advanced EMVs carry one of two rescue teams: type 1) doctors and nurses with advanced life-saving capabilities, as well as specially trained volunteer rescuers or type 2) nurses with advanced life-saving capabilities as well as specially trained volunteer rescuers. Basic EMVs carry a rescue team of specially trained volunteer rescuers with basic life support capabilities. Rescue helicopter teams consist of an anaesthesiologist, a nurse, and a mountain rescue technician.

\* Other: vehicle failure, patient not found, patient already transported, site unattainable.

**Table S3.** Emergency Medical Services (EMS) criticality codes\* by type of rescue vehicle dispatched and rescue completion (RC) at a hospital emergency department (HED); percentage of rescues completed at HED. Total emergency medical vehicles (EMV) dispatched: 1 658 728, with 1 239 760 RC at HED; 2013–2017.

| Type of Rescue Vehicle §          | EMS Criticality Codes |                |                |              |                 |
|-----------------------------------|-----------------------|----------------|----------------|--------------|-----------------|
|                                   | Red                   | Yellow         | Green          | White        | Overall         |
| RC at HED                         | N (%)                 | N (%)          | N (%)          | N (%)        | N (%)           |
| RC at HED/Type of rescue vehicle  | %                     | %              | %              | %            | %               |
| Basic EMV                         | 27 930 (2.5)          | 135 219 (11.9) | 926 604 (81.7) | 4 4604 (3.9) | 1 134 357 (100) |
| RC at HED                         | 13 992 (1.5)          | 102 031 (10.7) | 799 761 (84.0) | 36 421 (3.8) | 952 205 (100)   |
| RC at HED/all basic EMV           | 50.1                  | 75.5           | 86.3           | 81.7         | 83.9            |
| Doctor/nurse advanced EMV         | 78 146 (17.2)         | 328 392 (72.2) | 45 956 (10.1)  | 2 368 (0.5)  | 454 862 (100)   |
| RC at HED                         | 34 718 (14.5)         | 182 468 (76.0) | 22 269 (9.3)   | 665 (0.3)    | 240 120 (100)   |
| RC at HED/all type 1 advanced EMV | 44.4                  | 55.6           | 48.5           | 28.1         | 52.8            |
| Nurse advanced EMV                | 5 814 (9.8)           | 44 505 (75.0)  | 8 599 (14.5)   | 390 (0.7)    | 59 308 (100)    |
| RC at HED                         | 2 546 (6.3)           | 32 141 (79.3)  | 5 633 (13.9)   | 205 (0.5)    | 40 525 (100)    |
| RC at HED/all type 2 advanced EMV | 43.8                  | 72.2           | 65.5           | 52.6         | 68.3            |
| Helicopters                       | 3 516 (34.9)          | 4 709 (46.7)   | 1 542 (15.3)   | 318 (3.1)    | 10 085 (100)    |
| RC at HED                         | 2 151 (31.1)          | 3 617 (52.4)   | 1 122 (16.2)   | 17 (0.2)     | 6 907 (100)     |
| RC at HED/all Helicopters         | 61.2                  | 76.8           | 72.8           | 5.3          | 68.5            |
| Other vehicles                    | 13 (11.2)             | 26 (22.4)      | 61 (52.6)      | 16 (13.8)    | 116 (100)       |
| RC at HED                         | 2 (66.7)              | 0 (0.0)        | 1 (33.3)       | 0 (0.0)      | 3 (100)         |
| RC at HED/all other vehicles      | 15.4                  | 0.0            | 1.6            | 0.0          | 2.6             |
| Overall transports                | 115 419 (7.0)         | 512 851 (30.9) | 982 762 (59.2) | 47 696 (2.9) | 1 658 728 (100) |
| Overall RC at HED                 | 53 409 (4.3)          | 320 257 (25.8) | 828 786 (66.8) | 37 308 (3.0) | 1 239 760 (100) |
| RC at HED/all overall transports  | 46.3                  | 62.4           | 84.3           | 78.2         | 74.7            |

\*, EMS criticality codes—Red: need of an immediate response, life-threatening situation with a chance of survival; Yellow: rapid response, presence of a possible life-threatening condition not in an immediate danger of death; Green: the situation is not an emergency, presence of injuries, acute but stable conditions; White: the situation is not an emergency, minor injuries not a life-threatening situation, medical care not often required. §, Type of rescue vehicle: Advanced EMVs carry one of two rescue teams: type 1) doctors and nurses with advanced life-saving capabilities, as well as specially trained volunteer rescuers or type 2) nurses with advanced life-saving capabilities as well as specially trained volunteer rescuers. Basic EMVs carry a rescue team of specially trained volunteer rescuers with basic life support capabilities. Rescue helicopter teams consist of an anaesthesiologist, a nurse, and a mountain rescue technician. RC – rescue completion; HED – hospital emergency department.
